# Supplementary material
Source: PubMed Central journal article supplement (PMC4387078)
Supplement: NIHMS665168-supplement-1.pdf [file NIHMS665168-supplement-1.pdf]

|                     |                   |                   |                   |                    |                   |
|---------------------|-------------------|-------------------|-------------------|--------------------|-------------------|
| MGLQRFSFFV          | TLALVARSLA        | AIGPVASLVV        | ANAPVSPDGF        | LR                 | <b>DAIVVNGV</b>   |
| <b>VPSPLITGK</b> K  | GDRFQLNVDD        | TLTNHSMLKS        | TSIHWHGFFQ        | AGTNWADGPA         |                   |
| FVNQCPIASG          | HSFLYDFHVP        | DQAGTFWYHS        | HLSTQYCDGL        | <b>RGPFVVYDPK</b>  |                   |
| DPHASRYDVD          | <b>NESTVITLTD</b> | <b>WYHTAARLGP</b> | <b>RFPLGADATL</b> | <b>INGLGRSAST</b>  |                   |
| <b>PTAALAVINV</b>   | <b>QHGKRYRFRL</b> | VSISCDPNYT        | FSIDGHNLTV        | IEVDGINSQP         |                   |
| LLVDSIQIFA          | AQRYSFVLNA        | NQTVGNYWVR        | <b>ANPNFGTVGF</b> | <b>AGGINSAILR</b>  |                   |
| YQGAPVAEPT          | TTQTTSVIPL        | IETNLHPLAR        | <b>MPVPGSPTPG</b> | <b>GVDKALNLA</b> F |                   |
| NFNGTNFFIN          | NATFTPPTVP        | VLLQILSGAQ        | TAQDLLPAGS        | VYPLPAHSTI         |                   |
| EITLPATALA          | PGAPHPFHLH        | GHAFAVVR          | <b>SA</b>         | <b>GSTTYNYNDP</b>  | <b>IFRDVVSTGT</b> |
| <b>PAAGDNVTIR</b>   | FQTDNPGPWF        | LHCHIDFHL         | AGFAIVFAED        | VADVKAANPV         |                   |
| PK <b>AWSDLCP</b> I | <b>YDGLSEANQ</b>  |                   |                   |                    |                   |
